# Supplementary material
Source: PubMed Central journal article supplement (PMC5650067)
Supplement: NIHMS910417-supplement-Supplemental_Table_1.pdf [file NIHMS910417-supplement-Supplemental_Table_1.pdf]

Supplemental Table 1. **Inhibitors used in this study.**

| <b>Target Kinase</b> | <b>Inhibitors</b> | <b>Source</b>  | <b>Catalog Number</b> |
|----------------------|-------------------|----------------|-----------------------|
| PKC- $\alpha/\beta$  | Gö6976            | Millipore      | 365250                |
|                      | Gö6983            | Sigma-Aldrich  | G1918                 |
| p38- $\alpha/\beta$  | SB202190          | Sigma-Aldrich  | S7067                 |
|                      | SB203580          | Sigma-Aldrich  | S8307                 |
| EGFR                 | PD168393          | Sigma-Aldrich  | PZ0285                |
|                      | PD153035          | Sigma-Aldrich  | SML0564               |
| PI3K                 | Wortmannin        | Sigma-Aldrich  | W1628                 |
|                      | LY294002          | Cell Signaling | 9901S                 |
| MEK (ERK1/2)         | PD98059           | Sigma-Aldrich  | P215                  |
|                      | U0126             | Millipore      | 662005                |
| M3R                  | Atropine          | Sigma-Aldrich  | A0132                 |
| Src                  | PP2               | Millipore      | 529573                |
